# Supplementary material for: Optimal level activity of matrix metalloproteinases is critical for adult visual plasticity in the healthy and stroke-affected brain
Source: eLife. 2015 Nov 26;4:e11290. doi: 10.7554/eLife.11290 (PMC4718812; doi:10.7554/eLife.11290)
Supplement: Figure 2—source data 1. — DOI: http://dx.doi.org/10.7554/eLife.11290.005 [file elife-11290-fig2-data1.xlsx]

## Sheet: Figure 2A-source data
	Ocualr dominance indexes
	Control	Control+MD	GM6001	GM6001+7dMD
	0.17	0.04	0.3	0.2
	0.39	0.04	0.24	0.18
	0.33	0.05	0.17	0.28
	0.24	0	0.19	0.34
	0.27	-0.02	0.25	0.22
	0.22
Mean	0.27	0.022	0.23	0.244
SEM	0.03235	0.01356	0.02302	0.02926

## Sheet: Figure 2B-source data
			V1-activation
	Control (C)	Control (I)	Contol+MD (C)	Control+MD (I)	GM6001 (C)	GM6001 (I)	GM6001+MD (C)	GM6001+MD (I)
	1.06	0.72	2.32	2.14667	1.46	0.68	1.54	1.23
	2.36	1.23	1.66	1.6	1.76	1.17	1.86	1.32
	2.82	1.84	1.65	1.49	1.41	0.83	2.09	1.35
	2	1.52	1.99	2.29	2.46	1.87	2.04	1.1
	2.59	1.57	1.6	1.84	2.19	1.46	1.88	1.22
	1.39	0.95
Mean	2.037	1.305	1.844	1.873	1.856	1.202	1.882	1.244
SEM	0.2827	0.1709	0.1376	0.1535	0.2051	0.215	0.09635	0.04389
