# Supplementary material for: Optimal level activity of matrix metalloproteinases is critical for adult visual plasticity in the healthy and stroke-affected brain
Source: eLife. 2015 Nov 26;4:e11290. doi: 10.7554/eLife.11290 (PMC4718812; doi:10.7554/eLife.11290)
Supplement: Figure 3—source data 1. — DOI: http://dx.doi.org/10.7554/eLife.11290.007 [file elife-11290-fig3-data1.xlsx]

## Sheet: Figure 3A-source data
				Visual acuity (cyc/deg)
		Control		Control+MD		GM6001		GM6001+MD
	Days	mean	SEM	mean	SEM	mean	SEM	mean	SEM
	0	0.3755	0.00180278	0.3748	0.00269072	0.3726	0.00147	0.3738	0.00203
	1	0.3755	0.00180278	0.399	0.00432435	0.3744	0.00112	0.3756	0.00175
	2	0.376	0.00167332	0.4166	0.0049558	0.3744	0.00112	0.3768	0.0012
	3	0.377	0.001	0.4278	0.00383927	0.375	0.00134	0.379	0.00207
	4	0.3775	0.00092195	0.4374	0.00350143	0.375	0.00134	0.38	0.00197
	5	0.3775	0.00092195	0.4444	0.00263818	0.3756	0.00112	0.3812	0.00237
	6	0.3775	0.00092195	0.4518	0.0020347	0.3762	0.00073	0.3812	0.0018
	7	0.3775	0.00092195	0.4564	0.00092736	0.3762	0.00073	0.383	0.00285

## Sheet: FIgure 3B-source data
contrast sensitivity of the optomotro reflex
	Control		Control+MD		GM6001		GM6001+MD
spatial frequency (cyc/deg)	mean	SEM	mean	SEM	mean	SEM	mean	SEM
0.031	3.6	0.04	5.1	0.17	3.5	0.02	3.6	0.01
0.064	12.7	0.47	26.9	2.35	11.8	0.18	12.6	0.29
0.092	11.7	0.44	23.3	2.17	11	0.15	12	0.22
0.103	10.5	0.49	21.8	1.83	10.3	0.1	11.3	0.17
0.192	7	0.08	13.5	1.08	7	0.1	7.5	0.21
0.272	3.5	0.04	7.9	0.17	3.5	0.01	3.8	0.25
