# Supplementary material for: Optimal level activity of matrix metalloproteinases is critical for adult visual plasticity in the healthy and stroke-affected brain
Source: eLife. 2015 Nov 26;4:e11290. doi: 10.7554/eLife.11290 (PMC4718812; doi:10.7554/eLife.11290)
Supplement: Figure 5—source data 1. — DOI: http://dx.doi.org/10.7554/eLife.11290.011 [file elife-11290-fig5-data1.xlsx]

## Sheet: Figure 5A-source data
		Ocualr dominance indexes
	PT vehicle	PT+MD vehicle	PT 1xGM6001	PT+MD 1xGM6001 1h	PT+MD 1xGM6001 24h	PT+MD 2xGM6001 1h+24h
	0.25	0.27	0.21	-0.01	0.03	0.26
	0.2	0.12	0.35	0.08	0.06	0.07
	0.28	0.31	0.29	-0.03	0.05	0.16
	0.27	0.16	0.18	0.15	0.05	0.18
				0.07
Mean	0.25	0.215	0.2575	0.052	0.05	0.1675
SEM	0.0178	0.04481	0.0386	0.03262	0.006292	0.03902

## Sheet: Figure 5B-source data
V1-activation
	PT vehicle (C)	PT vehicle (I)	PT+MD vehicle (C)	PT+MD vehicle (I)	PT 1xGM6001 (C)	PT 1xGM6001 (I)	PT+MD 1xGM6001 1h (C)	PT+MD 1xGM6001 1h (I)	PT+MD 1xGM6001 24h (C)	PT+MD 1xGM6001 24h (I)	PT+MD 2xGM6001 1h+24h (C)	PT+MD 2xGM6001 1h+24h (I)
	1.79	1.12	1.71	1.03	2.13	1.48	1.36	1.45	1.42	1.47	2.07	1.24
	2.16	1.51	2.77	2.39	2.66	1.39	1.85	1.54	1.42	1.31	1.59	1.49
	2.17	1.09	2.62	1.44	2.17	1.34	1.65	1.35	1.22	1.11	1.7	1.21
	1.66	0.97	1.67	1.2	2.33	1.64	1.96	1.38	1.68	1.47	1.87	1.36
							1.81	1.91
Mean	1.945	1.173	2.193	1.515	2.323	1.463	1.726	1.526	1.435	1.34	1.808	1.325
SEM	0.1298	0.1171	0.2918	0.3035	0.1205	0.06588	0.1041	0.1014	0.0943	0.08544	0.1048	0.06384
