# Supplementary material for: Optimal level activity of matrix metalloproteinases is critical for adult visual plasticity in the healthy and stroke-affected brain
Source: eLife. 2015 Nov 26;4:e11290. doi: 10.7554/eLife.11290 (PMC4718812; doi:10.7554/eLife.11290)
Supplement: Figure 6—source data 1. — DOI: http://dx.doi.org/10.7554/eLife.11290.013 [file elife-11290-fig6-data1.xlsx]

## Sheet: Figure 6A-source data
Visual acuity of the optomotor refelex (cyc/deg)
	PT vehicle		PT+MD vehicle		PT+GM6001		PT+MD+GM6001
Days	mean	SEM	mean	SEM	mean	SEM	mean	SEM
0	0.375	0.00122474	0.37725	0.00188746	0.375	0.00122474	0.37857	0.00194
1	0.37575	0.00143614	0.37925	0.0023585	0.375	0.00122474	0.38779	0.00204
2	0.37575	0.00143614	0.38075	0.0030104	0.375	0.00122474	0.40429	0.00244
3	0.37575	0.00143614	0.3815	0.0037081	0.375	0.00122474	0.41357	0.00328
4	0.37575	0.00143614	0.3835	0.00361709	0.375	0.00122474	0.42264	0.00371
5	0.37575	0.00143614	0.3835	0.00361709	0.375	0.00122474	0.43093	0.00392
6	0.37575	0.00143614	0.3835	0.00361709	0.375	0.00122474	0.44064	0.00296
7	0.37575	0.00143614	0.3855	0.00417333	0.375	0.00122474	0.45107	0.00292

## Sheet: Figure 6B-source data
contrast sensitivity of the optomotor refelex
	PT vehicle		PT+MD vehicle		PT+GM6001		PT+MD+GM6001
spatial frequency (cycles/degree)	mean	SEM	mean	SEM	mean	SEM	mean	SEM
0.031	3.5	0.02	3.5	0.01	3.5	0.04	5	0.11
0.064	11.4	0.02	12.1	0.42	11.5	0.32	25.2	1.53
0.092	10.5	0.36	11.4	0.28	10.5	0.34	21.9	1.14
0.103	9.9	0.24	10.6	0.26	9.9	0.28	19.7	1.25
0.192	6.9	0.11	7	0.02	6.8	0.07	12.8	0.91
0.272	3.5	0.02	3.5	0.02	3.5	0.04	4.9	0.12
